# Supplementary material
Source: ML conference proceedings conference paper supplement (https://openreview.net/forum?id=IxMryAz2p3)
Supplement: supplementary_material [file aaai2026-unified-supp.pdf › paper-iclr26-supp/repo/paper/aaai2026-unified-supp.pdf]

**AAAI 2026 Supplementary Material**  
**Anonymous Submission**

*Anonymous submission*

## Appendix A.1: Dataset Overview

Table 1 lists the sources and licenses for all datasets used in the BTZSC benchmark. All datasets are publicly available on Hugging Face Datasets<sup>1</sup>. We use the same label verbalizers as used by (Laurer et al. 2023).

| Domain           | Dataset                   | Source                                  | License                                    |
|------------------|---------------------------|-----------------------------------------|--------------------------------------------|
| <b>Emotion</b>   |                           |                                         |                                            |
| dialogue         | empathetic_dialogues      | (Rashkin et al. 2019)                   | CC BY-NC 4.0                               |
| social-media     | emotiondair               | (Saravia et al. 2018)                   | Other (research/education)                 |
| <b>Intent</b>    |                           |                                         |                                            |
| banking          | banking77                 | (Casanueva et al. 2020)                 | CC BY 4.0                                  |
| social-media     | biasframes_intent         | (Sap et al. 2020)                       | CC BY 4.0                                  |
| <b>Sentiment</b> |                           |                                         |                                            |
| apps             | appreviews                | (Grano et al. 2017)                     | Unknown                                    |
| e-commerce       | amazonpolarity            | (Zhang, Zhao, and LeCun 2015a)          | Apache-2.0                                 |
| finance          | financialphrasebank       | (Malo et al. 2014)                      | CC BY-NC-SA 3.0                            |
| local-business   | yelpreviews               | (Zhang, Zhao, and LeCun 2015b)          | Terms of Use (non-commercial, 21 Feb 2020) |
| movies           | imdb                      | (Maas et al. 2011)                      | IMDb Non-Commercial Dataset Terms          |
| movies           | rottentomatoes            | (Pang and Lee 2005)                     | CC0 1.0 (Public Domain)                    |
| <b>Topic</b>     |                           |                                         |                                            |
| assistant        | massive                   | (FitzGerald et al. 2022)                | CC BY 4.0                                  |
| education        | trueteacher               | (Gekhman et al. 2023)                   | CC BY-NC 4.0                               |
| news             | agnews                    | (Zhang, Zhao, and LeCun 2015a)          | Non-commercial (AG Corpus terms)           |
| politics         | capsotu                   | (Jones et al. 2023; Laurer et al. 2023) | CC BY-NC-SA 4.0                            |
| politics         | manifesto                 | (Lehmann, Franzmann et al. 2024)        | see Terms of Use                           |
| qa-forum         | yahootopics               | (Zhang, Zhao, and LeCun 2015c)          | Unknown                                    |
| social-media     | biasframes_offensive      | (Sap et al. 2020)                       | CC BY 4.0                                  |
| social-media     | biasframes_sex            | (Sap et al. 2020)                       | CC BY 4.0                                  |
| wikipedia        | wikitoxic_insult          | (Wulczyn, Thain, and Dixon 2017)        | CC0 1.0                                    |
| wikipedia        | wikitoxic_obscene         | (Wulczyn, Thain, and Dixon 2017)        | CC0 1.0                                    |
| wikipedia        | wikitoxic_threat          | (Wulczyn, Thain, and Dixon 2017)        | CC0 1.0                                    |
| wikipedia        | wikitoxic_toxicaggregated | (Wulczyn, Thain, and Dixon 2017)        | CC0 1.0                                    |

Table 1: Source and licenses for all BTZSC datasets.

<sup>1</sup><https://huggingface.co/datasets>

## Appendix A.2: Model overview

| Model                          | Yr   | Arch.    | Backbone   | FT / train data <sup>†</sup>         | # P    | Pool / dim  |
|--------------------------------|------|----------|------------|--------------------------------------|--------|-------------|
| <b>Base encoders</b>           |      |          |            |                                      |        |             |
| bert-large-uncased             | 2018 | enc.     | BERT       | none                                 | 340 M  | —           |
| deberta-v3-large               | 2021 | enc.     | DeBERTa v3 | none                                 | 304 M  | —           |
| ModernBERT-large               | 2024 | enc.     | ModernBERT | none                                 | 395 M  | —           |
| <b>NLI cross-encoders</b>      |      |          |            |                                      |        |             |
| bart-large-mnli                | 2020 | enc-dec. | BART       | SNLI, MNLI                           | 406 M  | —           |
| nli-roberta-base               | 2020 | enc.     | RoBERTa    | SNLI, MNLI                           | 125 M  | —           |
| bert-base-uncased-nli          | —    | enc.     | BERT       | MNLI, ANLI, WANLI, FEVERNLI, LINGNLI | 110 M  | —           |
| bert-large-uncased-nli         | —    | enc.     | BERT       | same as above                        | 340 M  | —           |
| bert-large-uncased-nli-triplet | —    | enc.     | BERT       | same as above                        | 340 M  | —           |
| deberta-v3-base-nli            | —    | enc.     | DeBERTa v3 | same as above                        | 184 M  | —           |
| deberta-v3-large-nli           | —    | enc.     | DeBERTa v3 | same as above                        | 304 M  | —           |
| deberta-v3-large-nli-triplet   | —    | enc.     | DeBERTa v3 | same as above                        | 304 M  | —           |
| modernbert-base-nli            | —    | enc.     | ModernBERT | same as above                        | 149 M  | —           |
| modernbert-large-nli           | —    | enc.     | ModernBERT | same as above                        | 395 M  | —           |
| modernbert-large-nli-triplet   | —    | enc.     | ModernBERT | same as above                        | 395 M  | —           |
| <b>Rerankers</b>               |      |          |            |                                      |        |             |
| ms-marco-MiniLM-L6-v2          | 2021 | enc.     | MiniLM     | MS MARCO                             | 22.7 M | —           |
| gte-reranker-modernbert-base   | 2024 | enc.     | ModernBERT | large multiling. pairs               | 149 M  | —           |
| bge-reranker-base              | 2023 | enc.     | XLm-RoB. B | large multiling. pairs               | 278 M  | —           |
| bge-reranker-large             | 2023 | enc.     | XLm-RoB. L | large multiling. pairs               | 560 M  | —           |
| Qwen3-Reranker-0.6B            | 2025 | dec.     | Qwen3      | synthetic yes/no ranking data        | 0.6 B  | —           |
| Qwen3-Reranker-8B              | 2025 | dec.     | Qwen3      | synthetic yes/no ranking data        | 8 B    | —           |
| <b>Embedding models</b>        |      |          |            |                                      |        |             |
| all-MiniLM-L6-v2               | 2021 | enc.     | MiniLM     | 1 B paired sentences                 | 22.7 M | mean / 384  |
| e5-base-v2                     | 2023 | enc.     | E5 (BERT)  | 270 M synthetic contrastive          | 110 M  | mean / 768  |
| e5-large-v2                    | 2023 | enc.     | E5 (BERT)  | same as above                        | 335 M  | mean / 1024 |
| e5-mistral-7b-instruct         | 2024 | dec.     | Mistral-7B | synthetic multiling. contrastive     | 7 B    | last / 4096 |
| bge-base-en-v1.5               | 2023 | enc.     | BGE (RoB.) | 1.5 B pair data, contrastive         | 137 M  | CLS / 768   |
| bge-large-en-v1.5              | 2023 | enc.     | BGE (RoB.) | same as above                        | 434 M  | CLS / 1024  |
| gte-base-en-v1.5               | 2024 | enc.+    | GTE        | MLM + contrastive pre-train          | 137 M  | CLS / 768   |
| gte-large-en-v1.5              | 2024 | enc.+    | GTE        | same as above                        | 434 M  | CLS / 1024  |
| gte-modernbert-base            | 2024 | enc.     | ModernBERT | same as above                        | 149 M  | CLS / 768   |
| Qwen3-Embedding-0.6B           | 2025 | dec.     | Qwen3      | synthetic multiling. contrastive     | 0.6 B  | last / 1024 |
| Qwen3-Embedding-8B             | 2025 | dec.     | Qwen3      | synthetic multiling. contrastive     | 8 B    | last / 4096 |

Table 2: Architectural and training overview of the 31 models evaluated. Columns list publication year (Yr), encoder/decoder architecture (Arch.), backbone, principal fine-tuning or pre-training data, parameter count (#P), and pooling strategy with embedding dimensionality.

## Appendix A.3: Experimental Setup

### Cross-Encoder Architectures for NLI

Let a paired input sequence (premise || hypothesis) be tokenised as  $\mathbf{x} = (x_0 = [\text{CLS}], x_1, \dots, [\text{SEP}], \dots, x_{S-1})$  and encoded by a pre-trained Transformer backbone  $f_\theta : \mathbb{N}^S \rightarrow \mathbb{R}^{S \times E}$  with hidden size  $E$ :

$$H = f_\theta(\mathbf{x}) \in \mathbb{R}^{S \times E}, \quad h = H_0 \in \mathbb{R}^E \quad (\text{CLS row}).$$

A two-layer classification head with dropout  $p = 0.1$  transforms  $h$ :

$$\tilde{h} = \text{Dropout}_{0.1}(h), \quad (1)$$

$$u = \text{GELU}(W_1 \tilde{h} + b_1), \quad W_1 \in \mathbb{R}^{E \times E}, \quad b_1 \in \mathbb{R}^E, \quad (2)$$

$$z = \text{LayerNorm}(u), \quad (3)$$

$$\ell = W_2 z + b_2, \quad W_2 \in \mathbb{R}^{E \times C}, \quad b_2 \in \mathbb{R}^C, \quad (4)$$

where  $C$  is the number of label logits returned by the head. This setup mimicks the standard classification head of (Warner et al. 2024)

**Binary variant.** Here  $C = 1$  and  $\ell \in \mathbb{R}$  is an *entailment logit*. The probability of entailment is  $\sigma(\ell) = (1 + e^{-\ell})^{-1}$  and the model is optimised with binary-cross-entropy:

$$\mathcal{L}_{\text{BCE}}(y, \ell) = -y \log \sigma(\ell) - (1 - y) \log (1 - \sigma(\ell)), \quad y \in \{0, 1\}.$$

**Three-way variant (triplet).** Now  $C = 3$  with logits  $\ell = (\ell_{\text{ent}}, \ell_{\text{neut}}, \ell_{\text{contra}})$ . During *training* the standard multi-class cross-entropy is used:

$$\mathcal{L}_{\text{CE}}(y, \ell) = -\log \frac{\exp(\ell_y)}{\sum_{c=1}^3 \exp(\ell_c)}, \quad y \in \{1, 2, 3\}.$$

During *evaluation* the scalar entailment score is

$$s = \ell_{\text{ent}} - \log(e^{\ell_{\text{neut}}} + e^{\ell_{\text{contra}}}),$$

which is the log-odds of the ENTAILMENT class versus the union of the other two classes. The corresponding probability is  $\sigma(s)$ .

#### Dimensions.

- $B$ : batch size (omitted above for clarity),
- $S$ : sequence length,
- $E$ : hidden size of the backbone,
- $C \in \{1, 3\}$ : number of logits.

#### Training Procedure

**Validation signal.** Early stopping is triggered by the dev-set loss computed on an *equal-sized, balanced* union

$$\mathcal{D}_{\text{dev}} = \text{MNLI}_{\text{m}} \cup \text{MNLI}_{\text{mm}} \cup \text{ANLI}_{r1} \cup \text{ANLI}_{r2} \cup \text{ANLI}_{r3} \cup \text{WANLI} \cup \text{FEVERNLI} \cup \text{LINGNLI}.$$

At every evaluation step the loss is measured, and training stops when this loss fails to decrease for 10 consecutive evaluations, or 3 epochs, whichever comes first. Evaluation is performed every 1% of total steps.

**Optimiser and schedules.** Fine-tuning uses the PyTorch AdamW optimiser with default settings ( $\beta_1 = 0.9$ ,  $\beta_2 = 0.999$ ,  $\varepsilon = 10^{-8}$ , weight-decay = 0.01). The learning rate employs a *linear warm-up* for the first 10% of steps followed by *cosine decay*:

$$\eta_t = \begin{cases} \eta_0 \frac{t}{0.1T}, & 0 \leq t < 0.1T, \\ \frac{1}{2} \eta_0 \left( 1 + \cos \frac{\pi(t - 0.1T)}{0.9T} \right), & 0.1T \leq t \leq T, \end{cases}$$

with separate initial rates for the backbone ( $\eta_{\text{enc}}$ ) and classification head ( $\eta_{\text{head}}$ ).

- **Large backbones:**  $\eta_{\text{enc}} = 8 \times 10^{-6}$ ,  $\eta_{\text{head}} = 4 \times 10^{-5}$ .
- **Base backbones:**  $\eta_{\text{enc}} = 2 \times 10^{-5}$ ,  $\eta_{\text{head}} = 1 \times 10^{-4}$ .

All models train for  $E = 3$  epochs with mini-batch size  $B = 32$  and no layer freezing.

#### Qwen3 Reranker

**Prompt Template** For every *query–document* pair we build a single decoder-only prompt of the form

$$P = \text{prefix} + \langle \text{Instruct} \rangle: I + \langle \text{Query} \rangle: q + \langle \text{Document} \rangle: d + \text{suffix}.$$

## Fixed strings.

- **Prefix**

```
<|im_start|>system
Judge whether the Document meets the requirements based on the Query
and the Instruct provided. Note that the answer can only be "yes" or "no".
<|im_end|>
<|im_start|>user
```

- **Suffix**

```
<|im_end|>
<|im_start|>assistant
<think>

</think>
```

## Instructions I.

- **NLI retrieval**

Given a piece of text, retrieve the passage that entails the text the best

- **Label retrieval**

Given a piece of text, retrieve relevant label descriptions that best match the text

**Binary decision via “yes/no” tokens** Let  $\tau_{\text{yes}}$  and  $\tau_{\text{no}}$  be the token IDs that realise the strings “yes” and “no”. Denote the final-step logit vector by  $v = L_{S-1} \in \mathbb{R}^V$ . We extract

$$v_{\tau_{\text{yes}}}, v_{\tau_{\text{no}}}$$

and compute the entailment probability as

$$p_{\text{yes}} = \frac{e^{v_{\tau_{\text{yes}}}}}{e^{v_{\tau_{\text{yes}}}} + e^{v_{\tau_{\text{no}}}}}$$

## References

- Casanueva, I.; Temcinas, T.; Gerz, D.; Henderson, M.; and Vulić, I. 2020. Efficient Intent Detection with Dual Sentence Encoders. In *Proceedings of the 28th International Conference on Computational Linguistics*.
- FitzGerald, J.; et al. 2022. MASSIVE: A 1M-Example Multilingual NLU Dataset with 51 Typologically-Diverse Languages. In *EMNLP*.
- Gekhman, Z.; et al. 2023. TrueTeacher: Learning Factual Consistency Evaluation with Large Language Models. In *EMNLP*.
- Grano, G.; Sorbo, A. D.; Mercaldo, F.; Visaggio, C. A.; Canfora, G.; and Panichella, S. 2017. Android Apps and User Feedback: A Dataset for Software Evolution and Quality Improvement. In *Proceedings of the 2nd ACM SIGSOFT International Workshop on App Market Analytics (WAMA)*, 8–11.
- Jones, B. D.; Baumgartner, F. R.; Theriault, S. M.; Epp, D. A.; Eissler, R.; Lee, C.; and Sullivan, M. E. 2023. Policy Agendas Project: State of the Union Speeches. <https://www.comparativeagendas.net/>. Comparative Agendas Project dataset.
- Laurer, M.; van Atteveldt, W.; Casas, A.; and Welbers, K. 2023. Building Efficient Universal Classifiers with Natural Language Inference. ArXiv:2312.17543 [cs].
- Lehmann, P.; Franzmann, S.; et al. 2024. The Manifesto Data Collection, Version 2024a. In *WZB Data Release*.
- Maas, A. L.; Daly, R. E.; Pham, P. T.; Huang, D.; Ng, A. Y.; and Potts, C. 2011. Learning Word Vectors for Sentiment Analysis. In *ACL*.
- Malo, P.; et al. 2014. Good Debt or Bad Debt: Detecting Semantic Orientations in Economic Texts. *Journal of Emerging Technologies in Accounting*.
- Pang, B.; and Lee, L. 2005. Seeing Stars: Exploiting Class Relationships for Sentiment Categorization with Respect to Rating Scales. In *ACL*.
- Rashkin, H.; Smith, E. M.; Li, M.; and Boureau, Y.-L. 2019. Towards Empathetic Open-domain Conversation Models: A New Benchmark and Dataset. In *ACL*.

- Sap, M.; Gabriel, S.; Qin, L.; Jurafsky, D.; Smith, N. A.; and Choi, Y. 2020. Social Bias Frames: Reasoning about Social and Power Implications of Language. In *ACL*.
- Saravia, E.; Liu, H.-C. T.; Huang, Y.-H.; Wu, J.; and Chen, Y.-S. 2018. CARER: Contextualized Affect Representations for Emotion Recognition. In *Proceedings of EMNLP 2018*, 3687–3697. Brussels, Belgium.
- Warner, B.; Chaffin, A.; Clavié, B.; Weller, O.; Hallström, O.; Taghadouini, S.; Gallagher, A.; Biswas, R.; Ladhak, F.; Aarsen, T.; Cooper, N.; Adams, G.; Howard, J.; and Poli, I. 2024. Smarter, Better, Faster, Longer: A Modern Bidirectional Encoder for Fast, Memory Efficient, and Long Context Finetuning and Inference. *arXiv:2412.13663*.
- Wulczyn, E.; Thain, N.; and Dixon, L. 2017. Ex Machina: Personal Attacks Seen at Scale. In *WWW*.
- Zhang, X.; Zhao, J.; and LeCun, Y. 2015a. Character-level Convolutional Networks for Text Classification. In *NIPS*.
- Zhang, X.; Zhao, J.; and LeCun, Y. 2015b. Character-level Convolutional Networks for Text Classification. In (Zhang, Zhao, and LeCun 2015a). Yelp Reviews Polarity subset.
- Zhang, X.; Zhao, J.; and LeCun, Y. 2015c. Character-level Convolutional Networks for Text Classification. In (Zhang, Zhao, and LeCun 2015a). Yahoo Answers Topics subset.
