# Supplementary material
Source: ML conference proceedings conference paper supplement (https://openreview.net/forum?id=IxMryAz2p3)
Supplement: supplementary_material [file copyrightform.pdf › paper-iclr26-supp/repo/paper/Copyright/copyrightform.pdf]

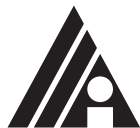

# Association for the Advancement of Artificial Intelligence

1101 Pennsylvania Ave, NW Suite 300

Washington, DC 20004

## AAAI COPYRIGHT FORM

Title of Article/Paper: \_\_\_\_\_

Publication in Which Article/Paper Is to Appear: \_\_\_\_\_

Author's Name(s): \_\_\_\_\_

Please type or print your name(s) as you wish it (them) to appear in print

### PART A – COPYRIGHT TRANSFER FORM

The undersigned, desiring to publish the above article/paper in a publication of the Association for the Advancement of Artificial Intelligence, (AAAI), hereby transfer their copyrights in the above article/paper to the Association for the Advancement of Artificial Intelligence (AAAI), in order to deal with future requests for reprints, translations, anthologies, reproductions, excerpts, and other publications.

This grant will include, without limitation, the entire copyright in the article/paper in all countries of the world, including all renewals, extensions, and reversions thereof, whether such rights current exist or hereafter come into effect, and also the exclusive right to create electronic versions of the article/paper, to the extent that such right is not subsumed under copyright.

The undersigned warrants that they are the sole author and owner of the copyright in the above article/paper, except for those portions shown to be in quotations; that the article/paper is original throughout; and that the undersigned right to make the grants set forth above is complete and unencumbered.

If anyone brings any claim or action alleging facts that, if true, constitute a breach of any of the foregoing warranties, the undersigned will hold harmless and indemnify AAAI, their grantees, their licensees, and their distributors against any liability, whether under judgment, decree, or compromise, and any legal fees and expenses arising out of that claim or actions, and the undersigned will cooperate fully in any defense AAAI may make to such claim or action. Moreover, the undersigned agrees to cooperate in any claim or other action seeking to protect or enforce any right the undersigned has granted to AAAI in the article/paper. If any such claim or action fails because of facts that constitute a breach of any of the foregoing warranties, the undersigned agrees to reimburse whomever brings such claim or action for expenses and attorneys' fees incurred therein.

### Returned Rights

In return for these rights, AAAI hereby grants to the above author(s), and the employer(s) for whom the work was performed, royalty-free permission to:

1. Retain all proprietary rights other than copyright (such as patent rights).
2. Personal reuse of all or portions of the above article/paper in other works of their own authorship. This does not include granting third-party requests for reprinting, republishing, or other types of reuse. AAAI must handle all such third-party requests.
3. Reproduce, or have reproduced, the above article/paper for the author's personal use, or for company use provided that AAAI copyright and the source are indicated, and that the copies are not used in a way that implies AAAI endorsement of a product or service of an employer, and that the copies per se are not offered for sale. The foregoing right shall not permit the posting of the article/paper in electronic or digital form on any computer network, except by the author or the author's employer, and then only on the author's or the employer's own web page or ftp site. Such web page or ftp site, in addition to the aforementioned requirements of this Paragraph, shall not post other AAAI copyrighted materials not of the author's or the employer's creation (including tables of contents with links to other papers) without AAAI's written permission.
4. Make limited distribution of all or portions of the above article/paper prior to publication.
5. In the case of work performed under a U.S. Government contract or grant, AAAI recognized that the U.S. Government has royalty-free permission to reproduce all or portions of the above Work, and to authorize others to do so, for official U.S. Government purposes only, if the contract or grant so requires.

In the event the above article/paper is not accepted and published by AAAI, or is withdrawn by the author(s) before acceptance by AAAI, this agreement becomes null and void.

(1)

\_\_\_\_\_  
Author/Authorized Agent for Joint Author's Signature

\_\_\_\_\_  
Date (MM/DD/YYYY)

\_\_\_\_\_  
Employer for whom work was performed

\_\_\_\_\_  
Title (if not author)

*(For jointly authored Works, all joint authors should sign unless one of the authors has been duly authorized to act as agent for the others.)*

# Association for the Advancement of Artificial Intelligence

1101 Pennsylvania Ave, NW Suite 300

Washington, DC 20004

## PART B – U.S. GOVERNMENT EMPLOYEE CERTIFICATION

This will certify that all authors of the above article/paper are employees of the U.S. Government and performed this work as part of their employment, and that the article/paper is therefore not subject to U.S. copyright protection. The undersigned warrants that they are the sole author/translator of the above article/paper, and that the article/paper is original throughout, except for those portions shown to be in quotations.

(2)

---

U.S. Government Employee Authorized Signature

---

Date (MM/DD/YYYY)

---

Name of Government Organization

---

Title (if not author)

*(Please read and sign and return Part B **only** if you are a government employee and created your article/paper as part of your employment. If your work was performed under Government contract, but you are not a Government employee, sign only at signature line (1) in Part A and see item 5 under returned rights. Authors who are U.S. government employees should also sign signature line (1) in Part A above to enable AAAI to claim and protect its copyright in international jurisdictions.)*

## PART C—CROWN COPYRIGHT CERTIFICATION

This will certify that all authors of the above article/paper are employees of the British or British Commonwealth Government and prepared the Work in connection with their official duties, and that the article/paper is therefore subject to Crown Copyright and is not assigned to AAAI as set forth in the first sentence of the Copyright Transfer Section in Part A. The undersigned warrants that they are the sole author/translator of the above article/paper, and that the article/paper is original throughout, except for those portions shown to be in quotations, and acknowledges that AAAI has the right to publish, distribute, and reprint the Work in all forms and all media.

(3)

---

British or British Commonwealth Government Employee Authorized Signature

---

Date (MM/DD/YYYY)

---

Name of Government Organization

---

Title (if not author)

*(Please read and sign and return Part C **only** if you are a British or British Commonwealth Government employee and the Work is subject to Crown Copyright. Authors who are British or British Commonwealth government employees should also sign signature line (1) in Part A above to indicate their acceptance of all terms other than the copyright transfer.)*
