# Supplementary material
Source: ML conference proceedings conference paper supplement (https://openreview.net/forum?id=IxMryAz2p3)
Supplement: supplementary_material [file photo-release.pdf › paper-iclr26-supp/repo/paper/Copyright/photo-release.pdf]

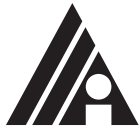

# Association for the Advancement of Artificial Intelligence

1101 Pennsylvania Ave, NW Suite 300  
Washington, DC 20004

## PHOTOGRAPH RELEASE

For valuable consideration received, I hereby give

---

the absolute and irrevocable right and permission, with respect to the photographs and film or tape that he/she has taken of me on the following date(s)

---

at the following location(s)

---

- (1) To copyright the same in his/her own name or any other name that he/she may choose.
- (2) To use, re-use, publish, and re-publish the same in whole or in part, individually or in conjunction with other photographs or images, in any medium and for any purpose whatsoever, including (but not by way of limitation) illustration, promotion, advertising and trade, and.
- (3) To use my name in connection therewith if he/she so chooses.

I hereby release and discharge the Photographer, his/her heirs, executors, assigns and any designee (including any agency, client, broadcaster, periodical or other publication) from any and all claims and demands arising out of or in connection with the use of such photographs, film, or tape, including but not limited to any claims for defamation or invasion or privacy.

I am of legal age and have read the foregoing and fully understand the contents thereof.

---

Signature

---

Date

---

Print Name

---

Witnessed by
