# Supplementary material
Source: ML conference proceedings conference paper supplement (https://openreview.net/forum?id=IxMryAz2p3)
Supplement: supplementary_material [file video-distribution.pdf › paper-iclr26-supp/repo/paper/Copyright/video-distribution.pdf]

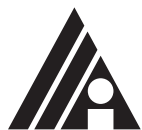

# Association for the Advancement of Artificial Intelligence

1101 Pennsylvania Ave, NW Suite 300

Washington, DC 20004

## VIDEO DISTRIBUTION LICENSE

Title of Video (Work): \_\_\_\_\_

Editor's Name(s): \_\_\_\_\_

Author's Name(s): \_\_\_\_\_

Please type or print your name(s) as you wish it (them) to appear in print

### Author's Grant

The undersigned, desiring to publish the above Work in a publication of the Association for the Advancement of Artificial Intelligence (AAAI), hereby grants to the Association for the Advancement of Artificial Intelligence the following nonexclusive rights:

- (1) The nonexclusive world rights to use the above-named Work as part of an AAAI publication, in all languages and for all editions.
- (2) The right to use the Work, together with the author's name(s) and the editor's name(s) and their pertinent biographical data, in advertising and promotion of it and the AAAI publication.
- (3) The right to publish or cause to be published the Work in connection with any republication of the AAAI publication in any medium including electronic.

### Author's Warranty

The undersigned warrants that they are the sole author and owner of the Work; that the Work is original throughout; that publication thereof will not violate or infringe any copyright or proprietary right; that the Work contains no scandalous, libelous, obscene, or otherwise unlawful matter, and that it does not invade the privacy or otherwise infringe upon the common-law or statutory rights of anyone; that, upon request of AAAI, the undersigned will obtain and furnish to AAAI written releases from all persons whose likenesses appear therein; and that the undersigned's right to make the licenses set forth is complete and unencumbered.

### Indemnifications; Enforcement of Rights

If anyone brings any claim or action alleging facts that, if true, constitute a breach of any of the foregoing warranties, the undersigned will hold harmless and indemnify AAAI, their grantees, their licensees, and their distributors against any liability, whether under judgment, decree, or compromise, and any legal fees and expenses arising out of that claim or actions, and the undersigned will cooperate fully in any defense AAAI may make to such claim or action. Moreover, the undersigned agrees to cooperate in any claim or other action seeking to protect or enforce any right the undersigned has granted to AAAI in the video. If any such claim or action fails because of facts that constitute a breach of any of the foregoing warranties, the undersigned agrees to reimburse whomever brings such claim or action for expenses and attorneys' fees incurred therein.

If the foregoing correctly reflects the understanding between us, please sign this document in the place indicated below and return it to us. In the event the above article/paper is not accepted and published by AAAI, or is withdrawn by the author(s) before acceptance by AAAI, this agreement becomes null and void.

\_\_\_\_\_  
Author's Signature

\_\_\_\_\_  
Date

\_\_\_\_\_  
Employer for whom work was performed

\_\_\_\_\_  
Title (if not author)
