# Supplementary material
Source: ML conference proceedings conference paper supplement (https://openreview.net/forum?id=IxMryAz2p3)

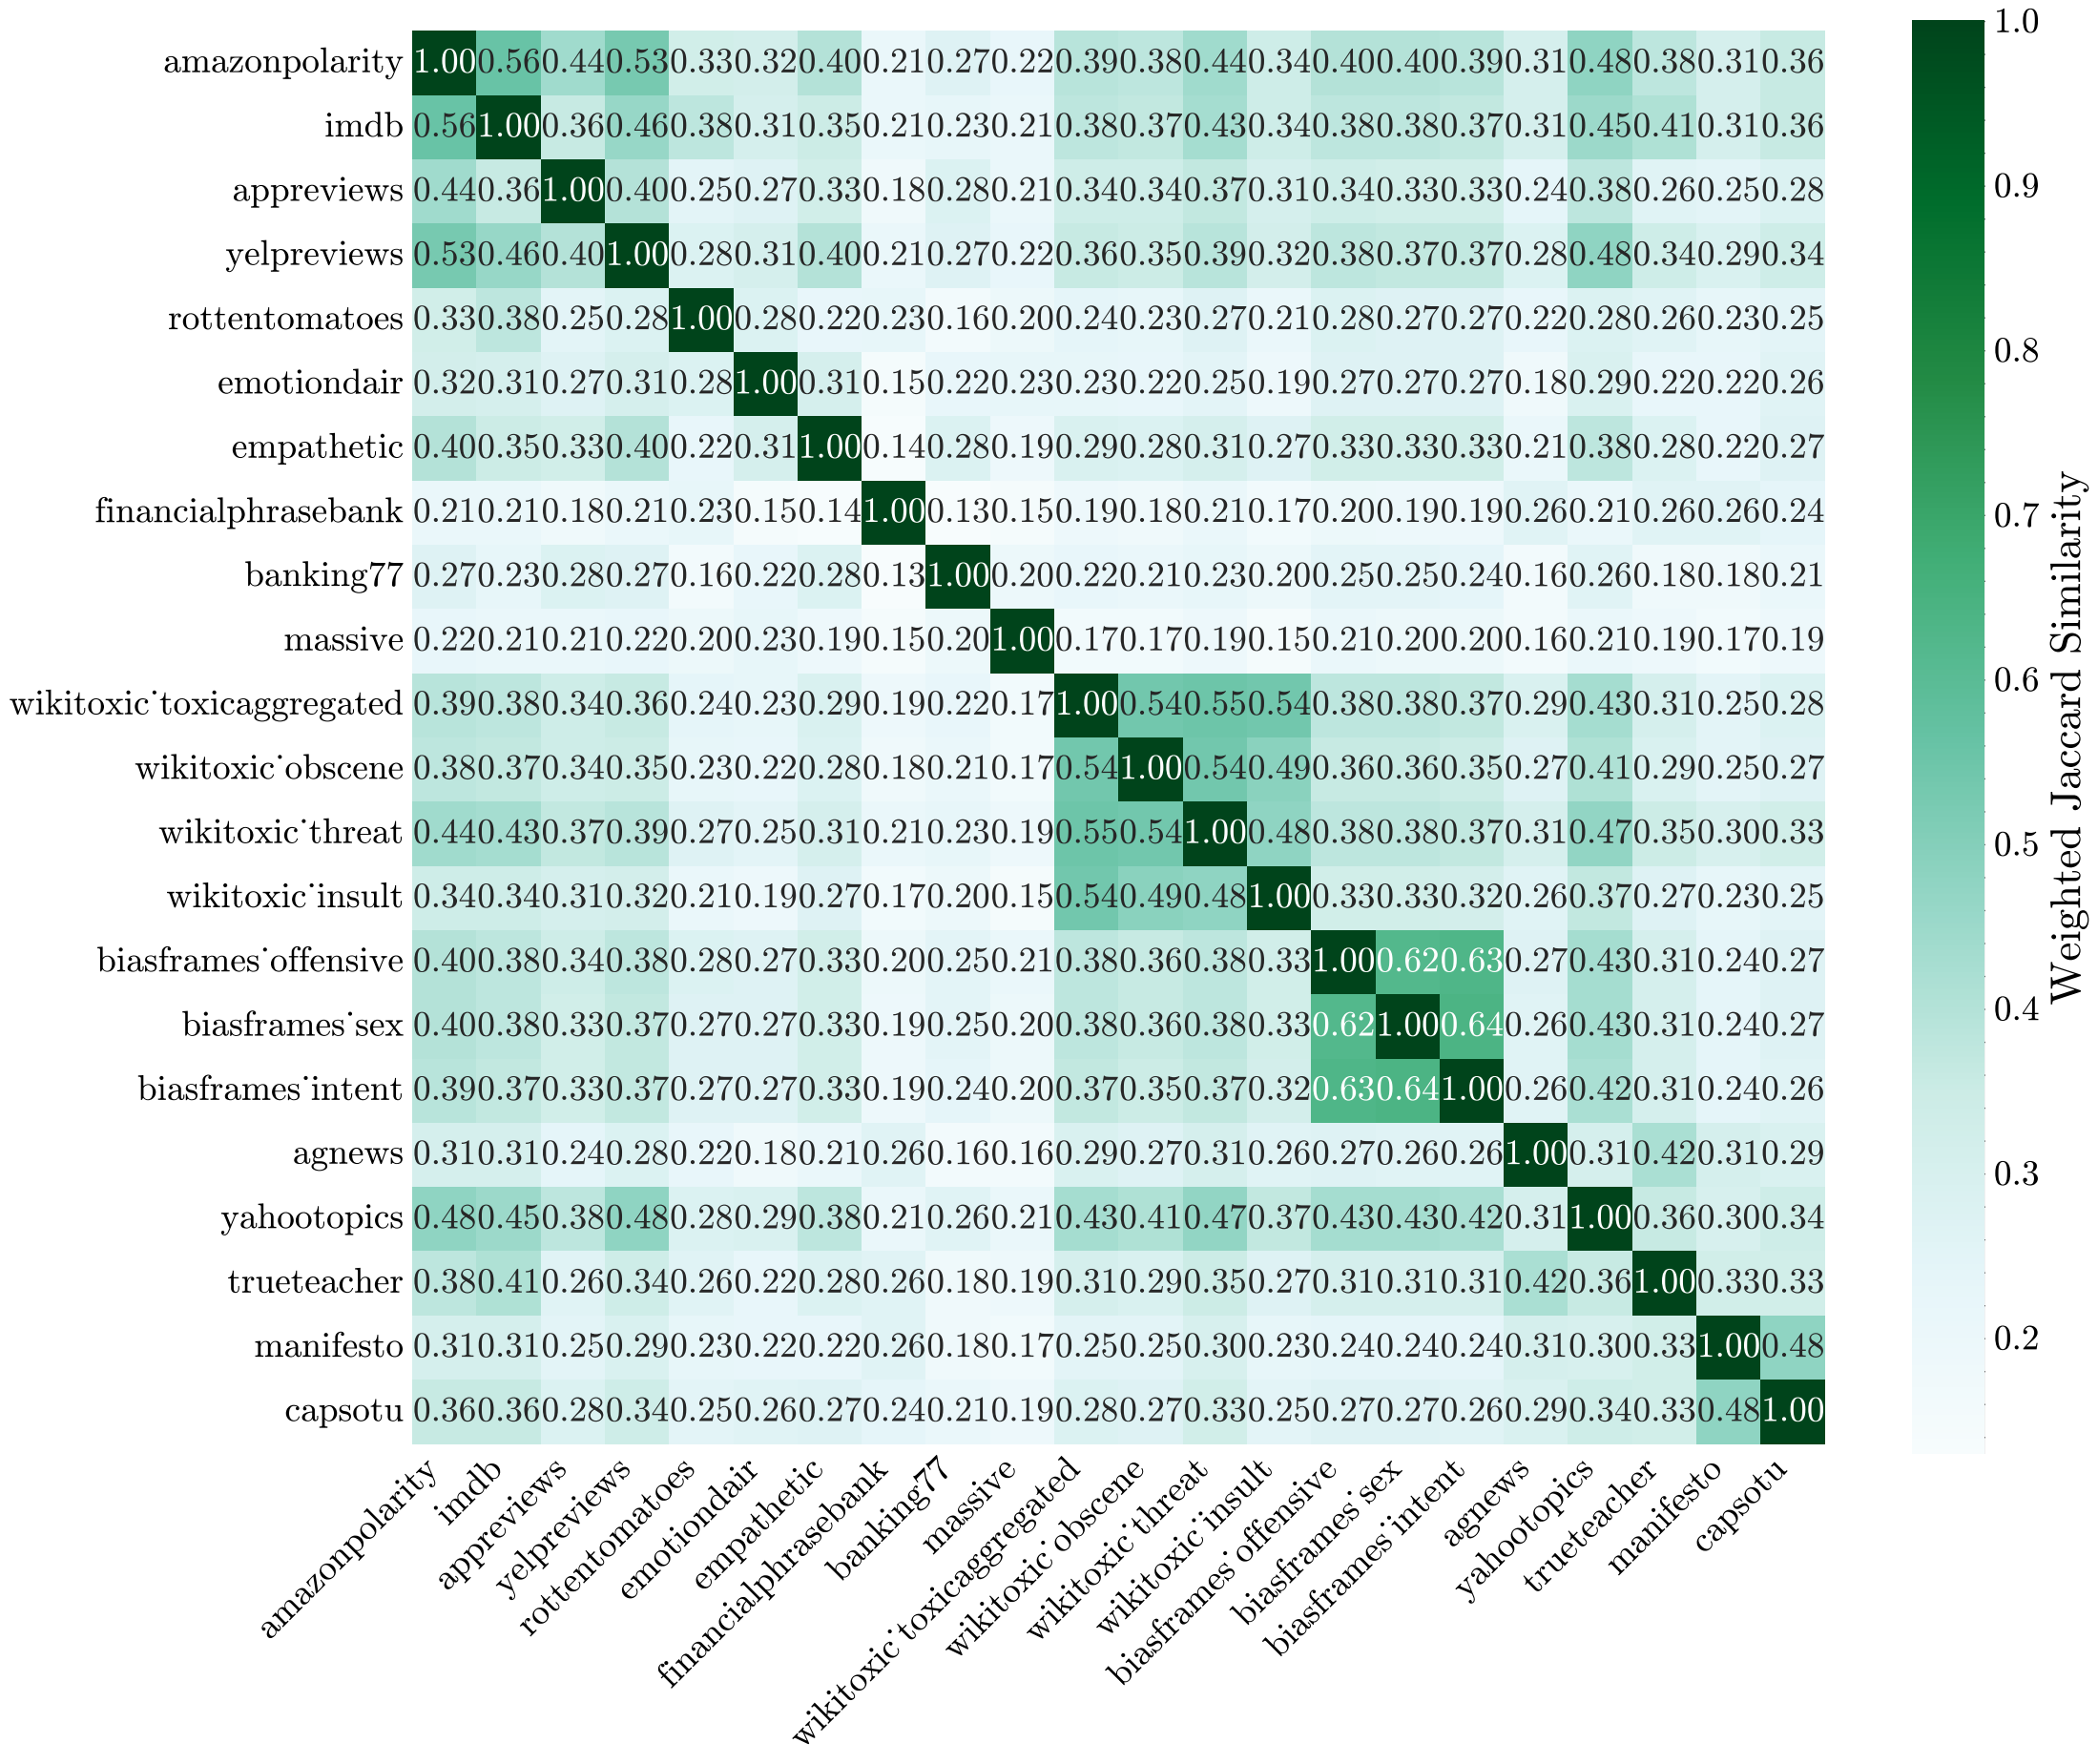

Supplement: supplementary_material [file fig_01_dss_jaq_sim.pdf › paper-iclr26-supp/repo/paper/figs/fig_01_dss_jaq_sim.pdf]

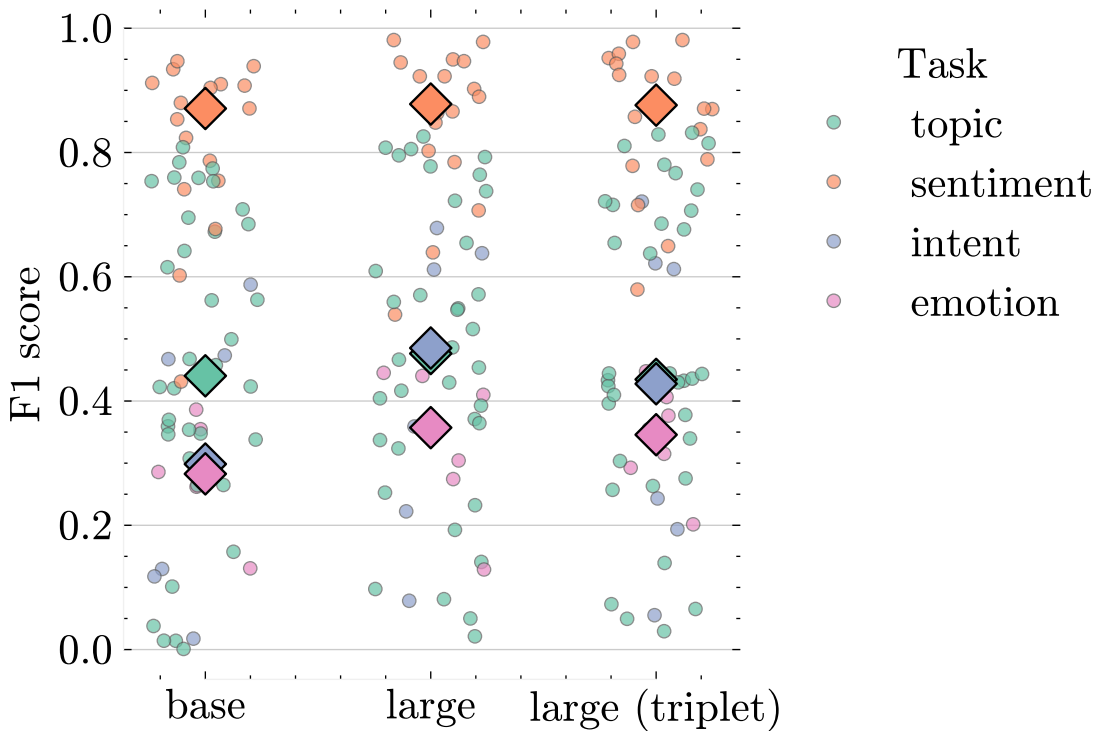

Supplement: supplementary_material [file fig_02_nli_performance_comparison.pdf › paper-iclr26-supp/repo/paper/figs/fig_02_nli_performance_comparison.pdf]

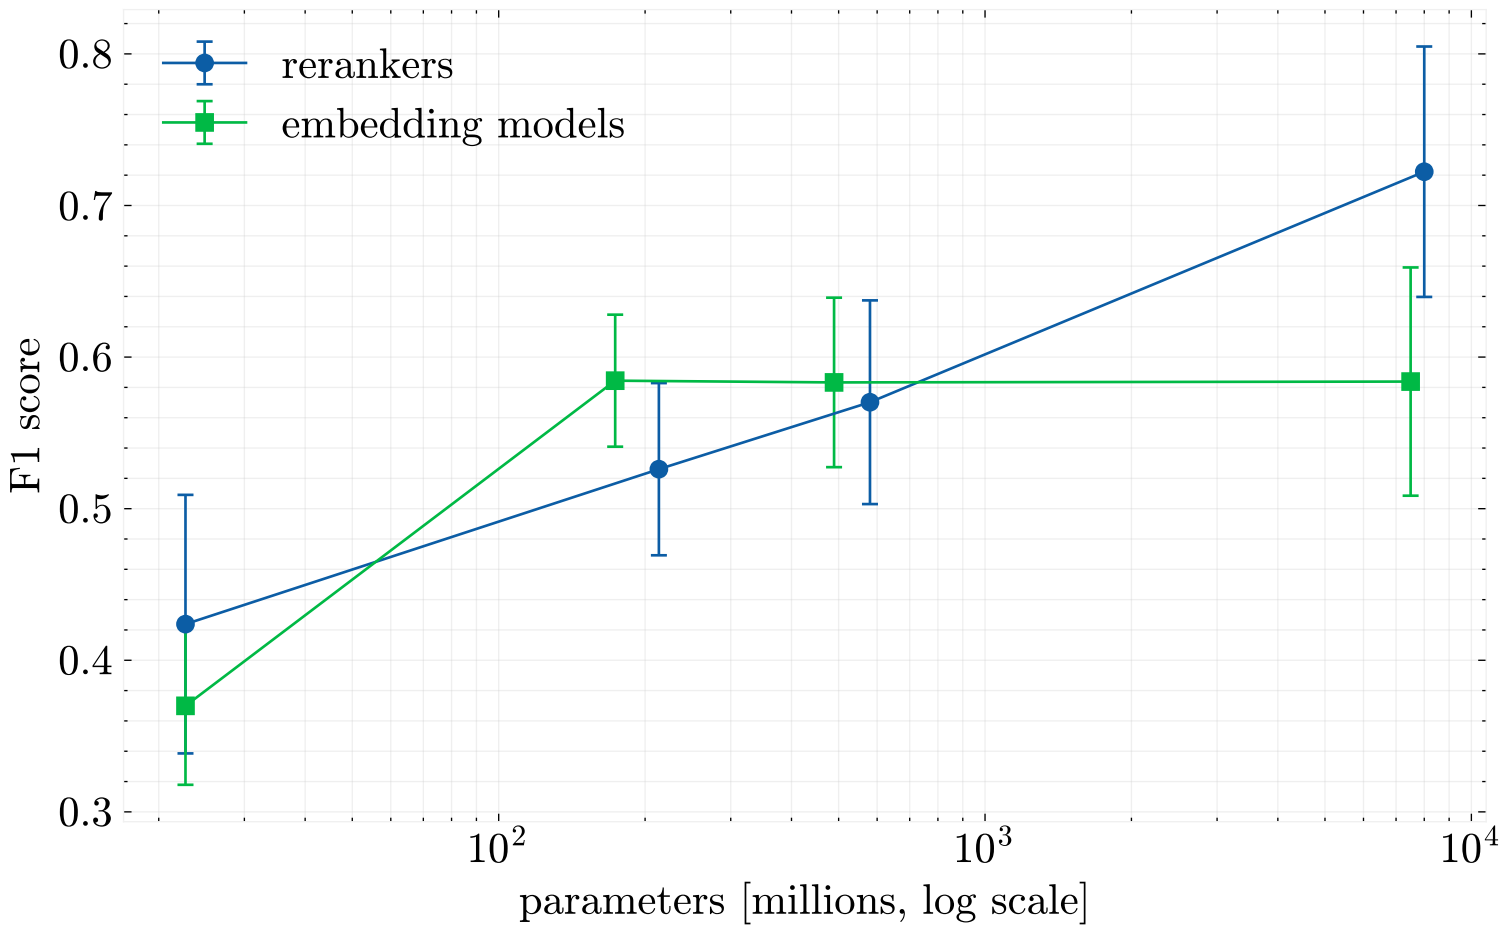

Supplement: supplementary_material [file fig_03_size_comparison.pdf › paper-iclr26-supp/repo/paper/figs/fig_03_size_comparison.pdf]

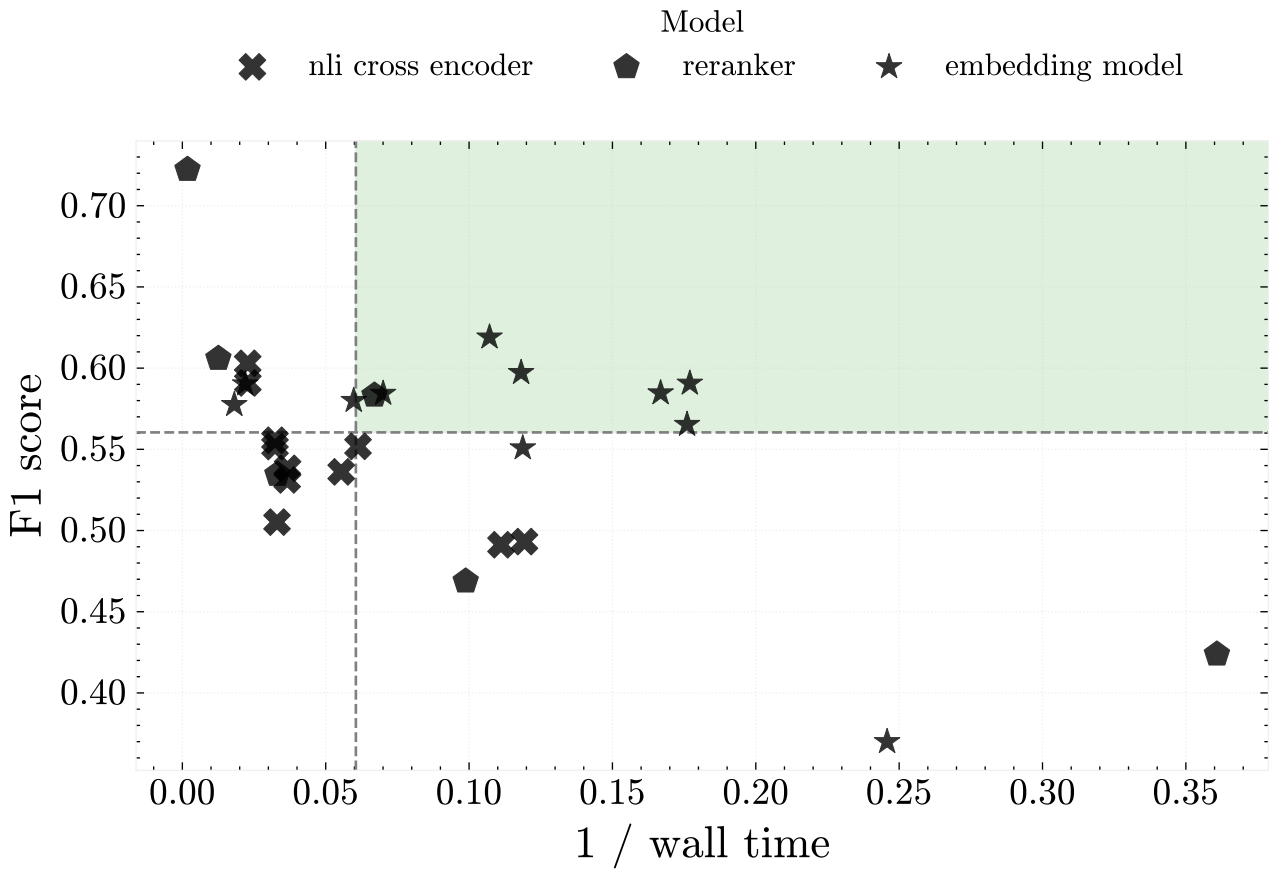

Supplement: supplementary_material [file fig_04_performance_v_latency.pdf › paper-iclr26-supp/repo/paper/figs/fig_04_performance_v_latency.pdf]

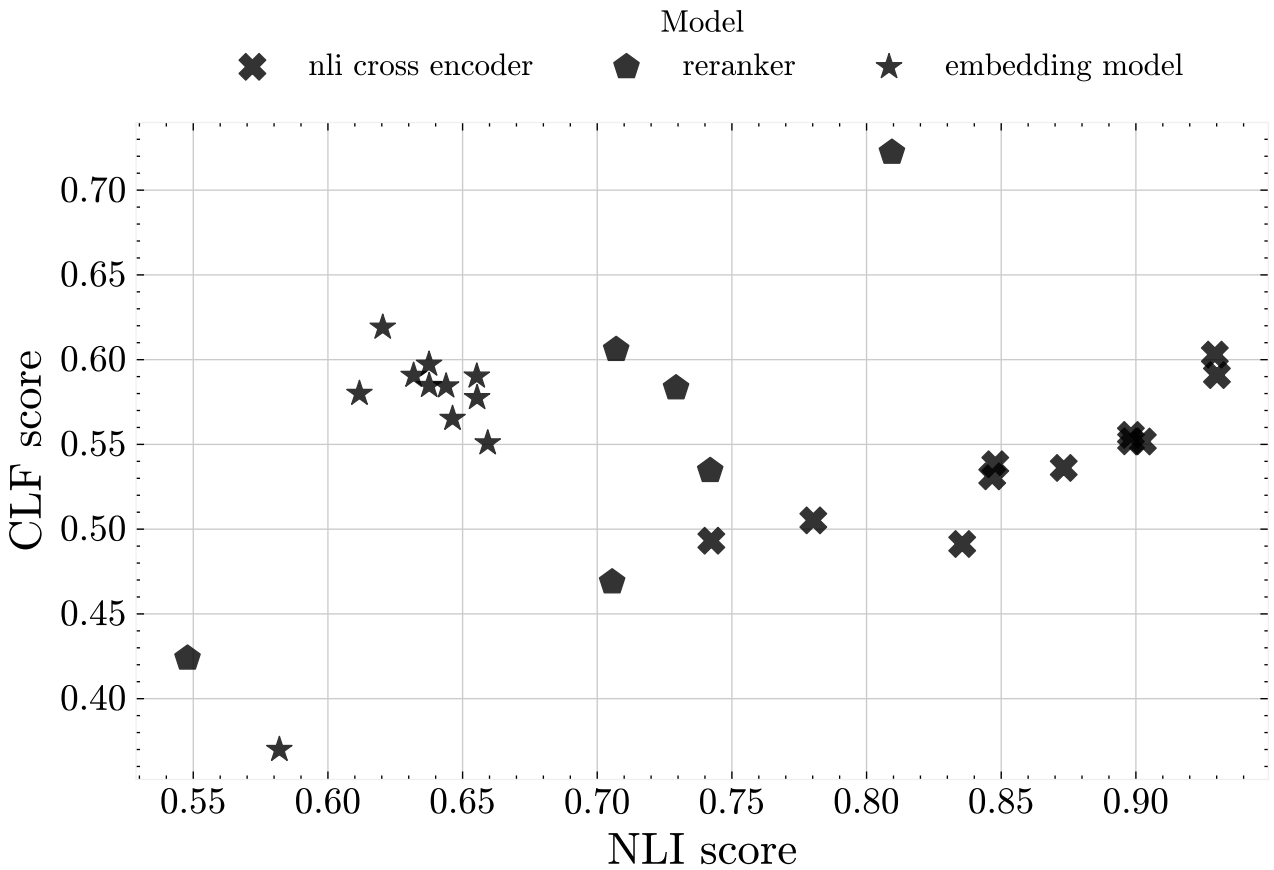

Supplement: supplementary_material [file fig_05_nli_vs_clf.pdf › paper-iclr26-supp/repo/paper/figs/fig_05_nli_vs_clf.pdf]
